# Supplementary material for: Qualitative and Quantitative Study of Glycosphingolipids in Human Milk and Bovine Milk Using High Performance Liquid Chromatography–Data-Dependent Acquisition–Mass Spectrometry
Source: PubMed Central journal article supplement (PMC7504816; doi:10.3390/molecules25174024), 2020-09-03
Supplement: molecules-25-04024-s001.pdf [file molecules-25-04024-s001.pdf]

## Supplementary Material

# Qualitative and Quantitative Study of Glycosphingolipids in Human Milk and Bovine Milk Using High Performance Liquid Chromatography–Data-Dependent Acquisition–Mass Spectrometry

Lin Ma <sup>1,\*</sup>, Bertram Y. Fong <sup>1</sup>, Alastair K. H. MacGibbon <sup>1</sup> and Gillian Norris <sup>2</sup>

<sup>1</sup> Fonterra Research and Development Centre, Dairy Farm Road, Private Bag 11029, Palmerston North 4442, New Zealand, Bertram.Fong@fonterra.com(B.Y.F.), alastair.macgibbon@fonterra.com(A.M.)

<sup>2</sup> Massey University, Private Bag 11222, Palmerston North 4442, New Zealand, G.Norris@massey.ac.nz

**Table S1.** List of GluCer molecular species found in the purified commercial standard with tentative identification based on accumulated MS, MS<sup>2</sup> and MS<sup>3</sup> data.

| <i>m/z</i> | <i>d-value</i> | Backbone<br><i>m/z</i> | Sphingoid<br>Base       | Fatty Amide<br><i>m/z</i> | Fatty<br>Acid | Tentative<br>ID |
|------------|----------------|------------------------|-------------------------|---------------------------|---------------|-----------------|
| 698.6      | d34:2          | 264.35                 | 18:1 – H <sub>2</sub> O | 236.34                    | 16:1          | C18:1/16:1      |
| 700.6      | d34:1          | 264.41                 | 18:1 – H <sub>2</sub> O | 256.33                    | 16:0          | C18:1/16:0      |
| 716.6      | d35:0          | 284.40                 | 18:0                    | 270.37                    | 17:0          | C18:0/17:0      |
| 728.6      | d36:1          | 236.32                 | 16:1 – H <sub>2</sub> O |                           |               | C16:1/20:0      |
|            |                | 264.28                 | 18:1 – H <sub>2</sub> O | 284.41                    | 18:0          | C18:1/18:0      |
| 744.6      | d37:0          | 256.36                 | 16:0 – H <sub>2</sub> O | 326.36                    | 21:0          | C16:0/21:0      |
| 756.6      | d38:1          | 236.30                 | 16:1 – H <sub>2</sub> O | 340.40                    | 22:0          | C16:1/22:0      |
|            |                | 264.33                 | 18:1 – H <sub>2</sub> O |                           |               | C18:1/20:0      |
| 770.6      | d39:1          | 236.24                 | 16:1 – H <sub>2</sub> O | 354.56                    | 23:0          | C16:1/23:0      |
|            |                | 250.34                 | 17:1 – H <sub>2</sub> O |                           |               | C17:1/22:0      |
|            |                | 264.32                 | 18:1 – H <sub>2</sub> O |                           |               | C18:1/21:0      |
| 772.6      | d39:0          | 237.29                 | 16:0 – H <sub>2</sub> O | 354.52                    | 23:0          | C16:0/23:0      |
|            |                | 251.20                 | 17:0 – H <sub>2</sub> O | 340.31                    | 22:0          | C17:0/22:0      |
| 782.6      | d40:2          | 264.31                 | 18:1 – H <sub>2</sub> O | 355.54                    | 22:1          | C18:1/22:1      |
|            |                | 236.29                 | 16:1 – H <sub>2</sub> O |                           |               | C16:1/24:0      |
|            |                | 250.36                 | 17:1 – H <sub>2</sub> O |                           |               | C17:1/23:0      |
| 784.6      | d40:1          | 264.32                 | 18:1 – H <sub>2</sub> O | 340.45                    | 22:0          | C18:1/22:0      |
|            |                | 237.44                 | 16:0 – H <sub>2</sub> O | 340.54                    | 22:0          | C16:0/24:0      |
|            |                | 252.53                 | 17:0 – H <sub>2</sub> O | 354.52                    | 23:0          | C17:0/23:0      |
| 786.6      | d40:0          | 266.34                 | 18:0 – H <sub>2</sub> O | 368.48                    | 24:0          | C18:0/22:0      |
|            |                | 250.25                 | 17:1 – H <sub>2</sub> O |                           |               | C17:1/24:1      |
| 796.6      | d41:2          | 264.31                 | 18:1 – H <sub>2</sub> O | 352.34                    | 23:1          | C18:1/23:1      |
|            |                | 250.27                 | 17:1 – H <sub>2</sub> O |                           |               | C17:1/24:0      |
| 798.6      | d41:1          | 264.29                 | 18:1 – H <sub>2</sub> O | 354.44                    | 23:0          | C18:1/23:0      |
|            |                | 266.43                 | 18:0 – H <sub>2</sub> O | 354.53                    | 23:0          | C18:0/23:0      |
| 800.6      | d41:0          | 250.34                 | 17:1 – H <sub>2</sub> O |                           |               | C17:1/25:1      |
|            |                | 264.30                 | 18:1 – H <sub>2</sub> O | 366.28                    | 24:1          | C18:1/24:1      |
|            |                | 278.35                 | 19:1 – H <sub>2</sub> O |                           |               | C19:1/23:1      |

|       |       |        |                         |        |      |            |
|-------|-------|--------|-------------------------|--------|------|------------|
| 812.6 | d42:1 | 264.34 | 18:1 – H <sub>2</sub> O | 368.55 | 24:0 | C18:1/24:0 |
|       |       | 278.33 | 19:1 – H <sub>2</sub> O | 354.41 | 23:0 | C19:1/23:0 |
| 814.6 | d42:0 | 266.38 | 18:0 – H <sub>2</sub> O | 368.52 | 24:0 | C18:0/24:0 |
|       |       | 280.30 | 19:0 – H <sub>2</sub> O | 354.40 | 23:0 | C19:0/23:0 |
| 826.6 | d43:1 | 264.27 | 18:1 – H <sub>2</sub> O | 382.62 | 25:0 | C18:1/25:0 |
|       |       | 278.29 | 19:1 – H <sub>2</sub> O | 368.51 | 24:0 | C19:1/24:0 |
|       |       | 292.34 | 20:1 – H <sub>2</sub> O | 354.48 | 23:0 | C20:1/23:0 |
| 828.6 | d43:0 | 267.51 | 18:1 – H <sub>2</sub> O | 382.50 | 25:0 | C18:0/25:0 |
|       |       | 280.49 | 19:1 – H <sub>2</sub> O | 368.56 | 24:0 | C19:0/24:0 |
|       |       | 294.51 | 20:0 – H <sub>2</sub> O | 354.54 | 23:0 | C20:0/23:0 |

**Table S2.** List of LacCer molecular species found in the purified commercial standard with tentative identification based on accumulated MS, MS<sup>2</sup> and MS<sup>3</sup> data.

| <i>m/z</i> | <b>d-value</b> | <b>Backbone</b><br><i>m/z</i> | <b>Sphingoid</b><br><b>Base</b> | <b>Fatty Amide</b><br><i>m/z</i> | <b>Fatty</b><br><b>Acid</b> | <b>Tentative ID</b> |
|------------|----------------|-------------------------------|---------------------------------|----------------------------------|-----------------------------|---------------------|
| 862.6      | d34:1          | 264.36                        | 18:1 – H <sub>2</sub> O         | 256.44                           | 16:0                        | C18:1/16:0          |
| 864.6      | d34:0          | 266.32                        | 18:0 – H <sub>2</sub> O         | 256.36                           | 16:0                        | C18:0/16:0          |
| 918.6      | d38:1          | 236.25                        | 16:1 – H <sub>2</sub> O         | 340.58                           | 22:0                        | C16:1/22:0          |
|            |                | 264.38                        | 18:1 – H <sub>2</sub> O         |                                  |                             | C18:1/20:0          |
| 920.6      | d38:0          | 256.37                        | 16:0                            | 340.41                           | 22:0                        | C16:0/22:0          |
| 932.6      | d39:1          | 236.23                        | 16:1                            | 354.49                           | 23:0                        | C16:1/23:0          |
|            |                | 250.34                        | 17:1                            |                                  |                             | C17:1/22:0          |
|            |                | 264.29                        | 18:1                            |                                  |                             | C18:1/21:0          |
| 934.6      | d39:0          | 256.36                        | 16:0                            | 354.51                           | 23:0                        | C16:0/23:0          |
| 946.6      | d40:1          | 236.26                        | 16:1                            | 340.52                           | 22:0                        | C16:1/24:0          |
|            |                | 250.39                        | 17:1                            | 354.36                           | 23:0                        | C17:1/23:0          |
|            |                | 264.29                        | 18:1                            | 368.45                           | 24:0                        | C18:1/22:0          |
| 948.6      | d40:0          | 256.38                        | 16:0                            | 340.41                           | 22:0                        | C16:0/24:0          |
|            |                | 284.42                        | 18:0                            | 368.49                           | 24:0                        | C18:0/22:0          |
| 960.6      | d41:1          | 250.32                        | 17:1                            |                                  |                             | C17:1/24:0          |
|            |                | 264.34                        | 18:1                            | 354.48                           | 23:0                        | C18:1/23:0          |
|            |                | 278.38                        | 19:1                            |                                  |                             | C19:1/22:0          |
| 962.6      | d41:0          | 284.35                        | 18:0                            | 354.46                           | 23:0                        | C18:0/23:0          |
|            |                | 298.63                        | 19:0                            |                                  |                             | C19:0/22:0          |
| 972.6      | d42:2          | 278.30                        | 16:1                            |                                  |                             | C16:1/26:1          |
|            |                | 264.97                        | 18:1                            | 366.17                           | 24:1                        | C18:1/24:1          |
| 974.6      | d42:1          | 264.31                        | 18:1                            | 368.35                           | 24:0                        | C18:1/24:0          |
| 976.6      | d42:0          | 266.22                        | 18:0                            | 368.53                           | 24:0                        | C18:0/24:0          |
| 988.6      | d43:1          | 264.34                        | 18:1                            | 382.19                           | 25:0                        | C18:1/25:0          |

**Table S3.** List of Crb molecular species found in human milk with their tentative identification based on observed evidence.

| <i>m/z</i> | <b>d-value</b> | <b>Backbone</b><br><i>m/z</i> | <b>Sphingoid</b><br><b>Base</b> | <b>Fatty Amide</b> <i>m/z</i> | <b>Fatty Acid</b>       | <b>Tentative ID</b> |
|------------|----------------|-------------------------------|---------------------------------|-------------------------------|-------------------------|---------------------|
| 654.36     | d31:3          | 264.27                        | 18:1 – H <sub>2</sub> O         |                               |                         | C18:1/13:2          |
| 670.56     | d32:2          | 236.24                        | 16:1 – H <sub>2</sub> O         | 236.24                        | 16:1 – H <sub>2</sub> O | C16:1/16:1          |

|        |                      |        |                         |        |                         |               |
|--------|----------------------|--------|-------------------------|--------|-------------------------|---------------|
|        |                      | 262.26 | 18:2 - H <sub>2</sub> O |        |                         | C18:2/14:0    |
|        |                      | 264.27 | 18:1 - H <sub>2</sub> O |        |                         | C18:1/14:1    |
| 672.38 | d32:1                | 264.27 | 18:1 - H <sub>2</sub> O | 228.13 | 14:0                    | C18:1/14:0    |
| 674.48 | d32:0 or<br>d31:1-OH | 228.13 | 14:0                    |        |                         | C14:0/18:0    |
|        |                      | 264.27 | 18:1 - H <sub>2</sub> O |        |                         | C18:1/13:0-OH |
| 682.39 | d33:3                | 236.24 | 16:1 - H <sub>2</sub> O | 266.28 | 17:2                    | C16:1/17:2    |
|        |                      | 252.27 | 17:0 - H <sub>2</sub> O | 250.25 | 16:3                    | C17:0/16:3    |
|        |                      | 256.26 | 16:0                    | 264.27 | 17:3                    | C16:0/17:3    |
|        |                      | 264.27 | 18:1 - H <sub>2</sub> O | 256.26 | 15:2 + H <sub>2</sub> O | C18:1/15:2    |
| 698.56 | d34:2                | 252.36 | 17:0 - H <sub>2</sub> O | 266.51 | 17:2                    | C17:0/17:2    |
|        |                      | 264.38 | 18:1 - H <sub>2</sub> O | 236.33 | 16:1 - H <sub>2</sub> O | C18:1/16:1    |
|        |                      | 266.51 | 18:0 - H <sub>2</sub> O | 252.36 | 16:2                    | C18:0/16:2    |
| 700.53 | d34:1                | 254.30 | 16:1                    | 266.40 | 18:0 - H <sub>2</sub> O | C16:1/18:0    |
|        |                      | 264.49 | 18:1                    | 256.36 | 16:0 - H <sub>2</sub> O | C18:1/16:0    |
| 702.50 | d33:1-OH             | 264.27 | 18:1 - H <sub>2</sub> O |        |                         | C18:1/15:0-OH |
| 710.59 | d35:3                | 236.24 | 16:1 - H <sub>2</sub> O |        |                         | C16:1/19:2    |
|        |                      | 252.27 | 17:0 - H <sub>2</sub> O |        |                         | C17:0/18:3    |
|        |                      | 262.25 | 18:2 - H <sub>2</sub> O | 250.25 | 17:1 - H <sub>2</sub> O | C18:2/17:1    |
|        |                      | 264.27 | 18:1 - H <sub>2</sub> O | 266.28 | 17:2                    | C18:1/17:2    |
| 712.57 | d35:2                | 284.30 | 18:0                    | 264.27 | 17:3                    | C18:0/17:3    |
|        |                      | 250.25 | 17:1 - H <sub>2</sub> O | 264.27 | 18:1 - H <sub>2</sub> O | C17:1/18:1    |
|        |                      | 262.25 | 18:2 - H <sub>2</sub> O |        |                         | C18:2/17:0    |
| 714.59 | d35:1                | 250.25 | 17:1 - H <sub>2</sub> O | 284.29 | 18:0                    | C17:1/18:0    |
|        |                      | 264.27 | 18:1 - H <sub>2</sub> O | 252.27 | 17:0 - H <sub>2</sub> O | C18:1/17:0    |
| 716.57 | d34:1-OH             | 264.49 | 18:1 - H <sub>2</sub> O | 272.00 | 16:0 - H + OH           | C18:1/16:0-OH |
|        |                      |        |                         | 300.25 | 18:0 - H + OH           | C16:1/18:0-OH |
| 726.62 | d36:2                | 252.27 | 17:0 - H <sub>2</sub> O |        |                         | C17:0/19:2    |
|        |                      | 264.27 | 18:1 - H <sub>2</sub> O | 264.27 | 18:1 - H <sub>2</sub> O | C18:1/18:1    |
| 728.60 | d36:1                | 264.33 | 18:1 - H <sub>2</sub> O | 284.30 | 18:0                    | C18:1/18:0    |
| 736.39 | d37:4                | 236.24 | 16:1 - H <sub>2</sub> O |        |                         | C16:1/21:3    |
|        |                      | 250.25 | 17:1 - H <sub>2</sub> O |        |                         | C17:1/20:3    |
|        |                      | 252.27 | 17:0 - H <sub>2</sub> O |        |                         | C17:0/20:4    |
|        |                      | 262.25 | 18:2 - H <sub>2</sub> O |        |                         | C18:2/19:2    |
|        |                      | 264.27 | 18:1 - H <sub>2</sub> O |        |                         | C18:1/19:3    |
| 738.65 | d37:3                | 236.24 | 16:1 - H <sub>2</sub> O |        |                         | C16:1/21:2    |
|        |                      | 252.27 | 17:0 - H <sub>2</sub> O |        |                         | C17:0/20:3    |
|        |                      | 262.25 | 18:2 - H <sub>2</sub> O |        |                         | C18:2/19:1    |
|        |                      | 264.27 | 18:1 - H <sub>2</sub> O | 312.33 | 19:2 + H <sub>2</sub> O | C18:1/19:2    |
| 740.64 | d37:2                | 264.27 | 18:1 - H <sub>2</sub> O |        |                         | C18:1/19:1    |
| 774.40 | d36:1-OH             | 264.27 | 18:1 - H <sub>2</sub> O | 300.29 | 18:0 - H + OH           | C18:1/18:0-OH |
| 752.63 | d38:3                | 250.25 | 17:1 - H <sub>2</sub> O |        |                         | C17:1/21:2    |
|        |                      | 262.25 | 18:2 - H <sub>2</sub> O |        |                         | C18:2/20:1    |
|        |                      | 264.27 | 18:1 - H <sub>2</sub> O |        |                         | C18:1/20:2    |
| 754.65 | d38:2                | 224.24 | 15:0 - H <sub>2</sub> O |        |                         | C15:0/23:2    |
|        |                      | 236.24 | 16:1 - H <sub>2</sub> O | 338.34 | 22:1                    | C16:1/22:1    |

|        |                      |        |                         |        |                         |               |
|--------|----------------------|--------|-------------------------|--------|-------------------------|---------------|
|        |                      | 252.27 | 17:0 - H <sub>2</sub> O |        |                         | C17:0/21:2    |
|        |                      | 262.25 | 18:2 - H <sub>2</sub> O |        |                         | C18:2/20:0    |
|        |                      | 264.27 | 18:1 - H <sub>2</sub> O | 310.31 | 20:1                    | C18:1/20:1    |
|        |                      | 310.31 | 20:1                    |        |                         | C20:1/18:0    |
| 756.63 | d38:1                | 236.36 | 16:1 - H <sub>2</sub> O |        |                         | C16:1/22:0    |
|        |                      | 264.40 | 18:1 - H <sub>2</sub> O | 312.63 | 20:0                    | C18:1/20:0    |
|        |                      | 280.29 | 19:0 - H <sub>2</sub> O |        |                         | C19:0/19:1    |
| 766.53 | d39:3                | 236.24 | 16:1 - H <sub>2</sub> O |        |                         | C16:1/23:2    |
|        |                      | 250.25 | 17:1 - H <sub>2</sub> O |        |                         | C17:1/22:2    |
|        |                      | 252.27 | 17:0 - H <sub>2</sub> O |        |                         | C17:0/22:3    |
|        |                      | 262.25 | 18:2 - H <sub>2</sub> O |        |                         | C18:2/21:1    |
|        |                      | 264.27 | 18:1 - H <sub>2</sub> O | 340.36 | 21:2 + H <sub>2</sub> O | C18:1/21:2    |
| 768.55 | d39:2                | 252.27 | 17:0 - H <sub>2</sub> O |        |                         | C17:0/22:2    |
|        |                      | 262.25 | 18:2 - H <sub>2</sub> O |        |                         | C18:2/21:0    |
|        |                      | 264.27 | 18:1 - H <sub>2</sub> O |        |                         | C18:1/21:1    |
| 770.57 | d39:1                | 250.48 | 17:1 - H <sub>2</sub> O |        |                         | C17:1/22:0    |
|        |                      | 264.34 | 18:1 - H <sub>2</sub> O | 326.79 | 21:0                    | C18:1/21:0    |
|        |                      | 278.36 | 19:1 - H <sub>2</sub> O |        |                         | C19:1/20:0    |
| 772.58 | d38:1-OH             | 236.19 | 16:1                    |        |                         | C16:1/22:0    |
|        |                      | 264.36 | 18:1                    |        |                         | C18:1/20:0    |
| 780.67 | d40:3                | 250.25 | 17:1 - H <sub>2</sub> O |        |                         | C17:1/23:2    |
|        |                      | 252.27 | 17:0 - H <sub>2</sub> O |        |                         | C17:0/23:3    |
|        |                      | 262.25 | 18:2 - H <sub>2</sub> O |        |                         | C18:2/22:1    |
|        |                      | 264.27 | 18:1 - H <sub>2</sub> O |        |                         | C18:1/22:2    |
| 782.65 | d40:2                | 224.47 | 15:0 - H <sub>2</sub> O |        |                         | C15:0/25:2    |
|        |                      | 236.37 | 16:1 - H <sub>2</sub> O | 366.84 | 24:1                    | C16:1/24:1    |
|        |                      | 252.42 | 17:0 - H <sub>2</sub> O | 368.63 | 23:2                    | C17:0/23:2    |
|        |                      | 262.46 | 18:2 - H <sub>2</sub> O |        |                         | C18:2/22:0    |
|        |                      | 264.41 | 18:1 - H <sub>2</sub> O | 338.74 | 22:1                    | C18:1/22:1    |
| 784.67 | d40:1                | 250.18 | 17:1 - H <sub>2</sub> O |        |                         | C17:1/23:0    |
|        |                      | 264.26 | 18:1 - H <sub>2</sub> O | 340.63 | 22:0                    | C18:1/22:0    |
|        |                      | 280.39 | 19:0 - H <sub>2</sub> O |        |                         | C19:0/21:1    |
| 786.60 | d40:0 or<br>d39:1-OH | 236.24 | 16:1 - H <sub>2</sub> O |        |                         | C16:1/23:0-OH |
|        |                      | 250.25 | 17:1 - H <sub>2</sub> O | 356.35 | 22:0-H + OH             | C17:1/22:0-OH |
|        |                      | 252.27 | 17:0 - H <sub>2</sub> O |        |                         | C17:0/23:0    |
|        |                      | 264.27 | 18:1 - H <sub>2</sub> O |        |                         | C18:1/21:0-OH |
| 792.55 | d41:4                | 250.25 | 17:1 - H <sub>2</sub> O |        |                         | C17:1/24:3    |
|        |                      | 252.27 | 17:0 - H <sub>2</sub> O | 378.37 | 24:4 + H <sub>2</sub> O | C17:0/24:4    |
|        |                      | 262.25 | 18:2 - H <sub>2</sub> O | 368.39 | 23:2 + H <sub>2</sub> O | C18:2/23:2    |
|        |                      | 264.27 | 18:1 - H <sub>2</sub> O | 366.37 | 23:3 + H <sub>2</sub> O | C18:1/23:3    |
| 794.60 | d41:3                | 250.25 | 17:1 - H <sub>2</sub> O |        |                         | C17:1/24:2    |
|        |                      | 252.27 | 17:0 - H <sub>2</sub> O |        |                         | C17:0/24:3    |
|        |                      | 262.25 | 18:2 - H <sub>2</sub> O |        |                         | C18:1/23:1    |
|        |                      | 264.27 | 18:1 - H <sub>2</sub> O | 368.39 | 23:2 + H <sub>2</sub> O | C18:1/23:2    |
| 796.62 | d41:2                | 250.14 | 17:1 - H <sub>2</sub> O |        |                         | C17:1/24:1    |
|        |                      | 264.42 | 18:1 - H <sub>2</sub> O | 370.27 | 23:1 + H <sub>2</sub> O | C18:1/23:1    |

|        |                      |        |                         |        |                         |               |
|--------|----------------------|--------|-------------------------|--------|-------------------------|---------------|
|        |                      | 278.63 | 19:1 - H <sub>2</sub> O |        |                         | C19:1/22:1    |
| 798.62 | d41:1                | 252.21 | 17:0 - H <sub>2</sub> O |        |                         | C17:0/24:1    |
|        |                      | 264.37 | 18:1 - H <sub>2</sub> O | 354.64 | 23:0                    | C18:1/23:0    |
|        |                      | 278.38 | 19:1 - H <sub>2</sub> O |        |                         | C19:1/22:0    |
| 800.57 | d41:0 or<br>d40:1-OH | 224.24 | 15:0 - H <sub>2</sub> O |        |                         | C15:0/26:0    |
|        |                      | 236.24 | 16:1 - H <sub>2</sub> O |        |                         | C16:1/24:0-OH |
|        |                      | 240.24 | 15:1                    | 398.36 | 25:0 - H + OH           | C15:1/25:0-OH |
|        |                      | 252.27 | 17:0 - H <sub>2</sub> O |        |                         | C17:0/24:0    |
|        |                      | 264.27 | 18:1 - H <sub>2</sub> O | 356.35 | 22:0 - H + OH           | C18:1/22:0-OH |
| 810.69 | d42:2                | 252.24 | 17:0 - H <sub>2</sub> O | 396.64 | 25:2 + H <sub>2</sub> O | C17:0/25:2    |
|        |                      | 262.18 | 18:2 - H <sub>2</sub> O | 368.62 | 24:0                    | C18:2/24:0    |
|        |                      | 264.37 | 18:1 - H <sub>2</sub> O | 366.55 | 24:1                    | C18:1/24:1    |
|        |                      | 278.51 | 19:1 - H <sub>2</sub> O |        |                         | C19:1/23:1    |
| 812.62 | d42:1                | 252.31 | 17:0 - H <sub>2</sub> O |        |                         | C17:0/25:1    |
|        |                      | 264.39 | 18:1 - H <sub>2</sub> O | 368.69 | 24:0                    | C18:1/24:0    |
|        |                      | 298.59 | 19:0                    |        |                         | C19:0/23:1    |
| 814.63 | d41:1-OH             | 250.32 | 17:1 - H <sub>2</sub> O |        |                         | C17:1/24:0-OH |
|        |                      | 264.45 | 18:1 - H <sub>2</sub> O | 352.38 | 23:0 - H + OH           | C18:1/23:0-OH |
| 824.70 | d43:2                | 250.25 | 17:1 - H <sub>2</sub> O |        |                         | C17:1/26:1    |
|        |                      | 252.27 | 17:0 - H <sub>2</sub> O |        |                         | C17:0/26:2    |
|        |                      | 262.25 | 18:2 - H <sub>2</sub> O |        |                         | C18:2/25:0    |
|        |                      | 264.27 | 18:1 - H <sub>2</sub> O |        |                         | C18:1/25:1    |
| 826.72 | d43:1                | 250.33 | 17:1 - H <sub>2</sub> O |        |                         | C17:1/26:0    |
|        |                      | 252.49 | 17:0 - H <sub>2</sub> O |        |                         | C17:0/26:1    |
|        |                      | 264.63 | 18:1 - H <sub>2</sub> O | 382.03 | 25:0                    | C18:1/25:0    |
|        |                      | 278.25 | 19:1 - H <sub>2</sub> O | 368.54 | 24:0                    | C19:1/24:0    |
| 828.69 | d43:0 or<br>d42:1-OH | 252.27 | 17:0 - H <sub>2</sub> O | 396.38 | 25:1 - H + OH           | C17:0/25:0-OH |
|        |                      | 252.27 | 17:0 - H <sub>2</sub> O | 396.38 | 26:0                    | C17:0/26:0    |
|        |                      | 264.27 | 18:1 - H <sub>2</sub> O | 384.38 | 24:0 - H + OH           | C18:1/24:0-OH |
| 838.63 | d44:2                | 240.24 | 15:1                    |        |                         | C15:1/29:1    |
|        |                      | 262.26 | 18:2 - H <sub>2</sub> O |        |                         | C18:2/26:0    |
|        |                      | 264.27 | 18:1 - H <sub>2</sub> O |        |                         | C18:1/26:1    |
|        |                      | 290.28 | 20:2 - H <sub>2</sub> O |        |                         | C20:2/24:0    |
|        |                      | 292.30 | 20:1 - H <sub>2</sub> O |        |                         | C20:1/24:1    |

**Table S4.** List of LacCer molecular species found in human milk with their tentative identification based on observed evidence.

| <i>m/z</i> | <b>d-value</b>       | <b>Backbone<br/><i>m/z</i></b> | <b>Sphingoid<br/>Base</b> | <b>Fatty<br/>Amide <i>m/z</i></b> | <b>Fatty Acid</b>       | <b>Tentative ID</b> |
|------------|----------------------|--------------------------------|---------------------------|-----------------------------------|-------------------------|---------------------|
| 862.63     | d34:1                | 264.42                         | 18:1 - H <sub>2</sub> O   | 256.48                            | 16:0                    | C18:1/16:0          |
| 864.70     | d34:0 or<br>d33:1-OH | 236.24                         | 16:1 - H <sub>2</sub> O   |                                   |                         | C16:1/17:0-OH       |
|            |                      | 252.27                         | 17:0 - H <sub>2</sub> O   | 252.27                            | 17:0 - H <sub>2</sub> O | C17:0/C17:0         |
|            |                      | 256.26                         | 16:0                      | 284.29                            | 18:0                    | C16:0/18:0          |
|            |                      | 264.27                         | 18:1 - H <sub>2</sub> O   |                                   |                         | C18:1/15:0-OH       |
| 890.65     | d36:1                | 224.24                         | 15:0 - H <sub>2</sub> O   |                                   |                         | C15:0/21:1          |
|            |                      | 236.24                         | 16:1 - H <sub>2</sub> O   |                                   |                         | C16:1/20:0          |

|        |                      |        |                         |        |                         |               |
|--------|----------------------|--------|-------------------------|--------|-------------------------|---------------|
|        |                      | 252.27 | 17:0 - H <sub>2</sub> O | 314.28 | 19:1 + H <sub>2</sub> O | C17:0/19:1    |
|        |                      | 264.27 | 18:1 - H <sub>2</sub> O | 284.29 | 18:0                    | C18:1/18:0    |
| 914.78 | d38:3                | 264.27 | 18:1 - H <sub>2</sub> O |        |                         | C18:1/20:2    |
| 916.78 | d38:2                | 264.27 | 18:1 - H <sub>2</sub> O |        |                         | C18:1/20:1    |
|        |                      | 280.27 | 19:0 - H <sub>2</sub> O |        |                         | C19:0/19:2    |
| 918.69 | d38:1                | 236.35 | 16:1 - H <sub>2</sub> O | 340.72 | 22:0                    | C16:1/22:0    |
|        |                      | 264.41 | 18:1 - H <sub>2</sub> O | 312.47 | 20:0                    | C18:1/20:0    |
|        |                      | 278.05 | 19:1 - H <sub>2</sub> O | 316.34 | 19:0 + H <sub>2</sub> O | C19:1/19:0    |
| 930.84 | d39:2                | 236.24 | 16:1 - H <sub>2</sub> O |        |                         | C16:1/23:1    |
|        |                      | 252.27 | 17:0 - H <sub>2</sub> O |        |                         | C17:0/22:2    |
|        |                      | 264.27 | 18:1 - H <sub>2</sub> O |        |                         | C18:1/21:1    |
| 932.71 | d39:1                | 278.27 | 19:1 - H <sub>2</sub> O | 330.21 | 20:0 + H <sub>2</sub> O | C19:1/20:0    |
| 946.72 | d40:1                | 236.48 | 16:1 - H <sub>2</sub> O |        |                         | C16:1/24:0    |
|        |                      | 264.42 | 18:1 - H <sub>2</sub> O | 340.67 | 22:0                    | C18:1/22:0    |
|        |                      | 288.30 | 17:0 + H <sub>2</sub> O |        |                         | C17:0/23:1    |
| 954.72 | d41:4                | 252.27 | 17:0 - H <sub>2</sub> O |        |                         | C17:0/24:4    |
|        |                      | 262.25 | 18:2 - H <sub>2</sub> O | 368.39 | 23:2 + H <sub>2</sub> O | C18:2/23:2    |
|        |                      | 264.27 | 18:1 - H <sub>2</sub> O | 366.37 | 23:3 + H <sub>2</sub> O | C18:1/23:3    |
| 956.65 | d41:3                | 234.12 | 16:2 - H <sub>2</sub> O |        |                         | C16:2/25:1    |
|        |                      | 264.27 | 18:1 - H <sub>2</sub> O |        |                         | C18:1/23:2    |
| 960.74 | d41:1                | 264.35 | 18:1 - H <sub>2</sub> O | 354.28 | 23:0                    | C18:1/23:0    |
|        |                      | 278.39 | 19:1 - H <sub>2</sub> O | 358.26 | 22:0 + H <sub>2</sub> O | C19:1/22:0    |
| 974.75 | d42:1                | 252.27 | 17:0 - H <sub>2</sub> O |        |                         | C17:0/25:1    |
|        |                      | 264.27 | 18:1 - H <sub>2</sub> O | 368.39 | 24:0                    | C18:1/24:0    |
| 988.77 | d43:1                | 264.42 | 18:1 - H <sub>2</sub> O | 400.27 | 25:0 + H <sub>2</sub> O | C18:1/25:0    |
|        |                      | 278.29 | 19:1 - H <sub>2</sub> O | 386.08 | 24:0 + H <sub>2</sub> O | C19:1/24:0    |
| 990.74 | d43:0 or<br>d42:1-OH | 264.27 | 18:1 - H <sub>2</sub> O |        |                         | C18:1/24:0-OH |
|        |                      |        |                         | 300.29 | 18:0 - H + OH           | C24:1/18:0-OH |
| 992.76 | d44:6                | 264.27 | 18:1 - H <sub>2</sub> O | 386.07 | 26:5                    | C18:1/26:5    |
|        |                      | 300.29 | 21:4 - H <sub>2</sub> O | 368.39 | 23:2 + H <sub>2</sub> O | C21:4/23:2    |
|        |                      | 318.30 | 22:2 - H <sub>2</sub> O |        |                         | C22:2/22:4    |

**Table S5.** List of Crb molecular species found in bovine milk with their tentative identification based on observed evidence.

| <i>m/z</i> | <i>d</i> -value      | Backbone<br><i>m/z</i> | Sphingoid<br>Base | Fatty Amide <i>m/z</i>  | Fatty Acid | Tentative ID            |               |
|------------|----------------------|------------------------|-------------------|-------------------------|------------|-------------------------|---------------|
| 670.56     | d32:2                | 236.24                 |                   | 16:1 - H <sub>2</sub> O | 236.24     | 16:1 - H <sub>2</sub> O | C16:1/16:1    |
|            |                      | 250.25                 |                   | 17:1 - H <sub>2</sub> O |            |                         | C17:1/15:1    |
|            |                      | 264.27                 |                   | 18:1 - H <sub>2</sub> O |            |                         | C18:1/14:1    |
| 672.37     | d32:1                | 224.24                 |                   | 15:0 - H <sub>2</sub> O | 250.25     | 17:1 - H <sub>2</sub> O | C15:0/17:1    |
|            |                      | 236.24                 |                   | 16:1 - H <sub>2</sub> O | 256.26     | 16:0                    | C16:1/16:0    |
|            |                      | 252.27                 |                   | 17:0 - H <sub>2</sub> O |            |                         | C17:0/15:1    |
|            |                      | 264.27                 |                   | 18:1 - H <sub>2</sub> O | 228.13     | 14:0                    | C18:1/14:0    |
| 674.48     | d32:0 or<br>d31:1-OH | 236.24                 |                   | 16:1 - H <sub>2</sub> O |            |                         | C16:1/15:0-OH |
|            |                      | 264.27                 |                   | 18:1 - H <sub>2</sub> O |            |                         | C18:1/13:0-OH |

|        |                      |        |                         |        |                         |               |
|--------|----------------------|--------|-------------------------|--------|-------------------------|---------------|
| 682.60 | d33:3                | 252.27 | 17:0 – H <sub>2</sub> O | 268.26 | 16:3 + H <sub>2</sub> O | C17:0/16:3    |
|        |                      | 264.27 | 18:1 – H <sub>2</sub> O | 256.26 | 15:2 + H <sub>2</sub> O | C18:1/15:2    |
| 684.61 | d33:2                | 250.25 | 17:1 – H <sub>2</sub> O |        |                         | C17:1/16:1    |
|        |                      | 252.27 | 17:0 – H <sub>2</sub> O | 252.27 | 16:2                    | C17:0/16:2    |
|        |                      | 264.27 | 18:1 – H <sub>2</sub> O | 240.10 | 15:1                    | C18:1/15:1    |
| 686.51 | d33:1                | 250.25 | 17:1 – H <sub>2</sub> O | 256.26 | 16:0                    | C17:1/16:0    |
|        |                      | 264.27 | 18:1 – H <sub>2</sub> O |        |                         | C18:1/15:0    |
| 698.56 | d34:2                | 264.58 | 18:1 – H <sub>2</sub> O | 272.48 | 16:1 + H <sub>2</sub> O | C18:1/16:1    |
| 700.49 | d34:1                | 252.27 | 17:0 – H <sub>2</sub> O | 286.01 | 17:1 + H <sub>2</sub> O | C17:0/17:1    |
|        |                      | 264.27 | 18:1 – H <sub>2</sub> O | 256.26 | 16:0                    | C18:1/16:0    |
| 702.51 | d34:0 or<br>d33:1–OH | 256.26 | 16:0                    | 284.29 | 18:0                    | C16:0/18:0    |
|        |                      | 252.27 | 17:0 – H <sub>2</sub> O | 252.27 | 17:0 – H <sub>2</sub> O | C17:0/17:0    |
|        |                      | 284.29 | 18:0                    | 256.26 | 16:0                    | C18:0/16:0    |
|        |                      | 264.27 | 18:1 – H <sub>2</sub> O |        |                         | C18:1/15:0–OH |
| 710.59 | d35:3                | 236.24 | 16:1 – H <sub>2</sub> O |        |                         | C16:1/19:2    |
|        |                      | 252.27 | 17:0 – H <sub>2</sub> O |        |                         | C17:0/18:3    |
|        |                      | 264.27 | 18:1 – H <sub>2</sub> O | 284.29 | 17:2 + H <sub>2</sub> O | C18:1/17:2    |
| 712.61 | d35:2                | 236.24 | 16:1 – H <sub>2</sub> O | 278.28 | 19:1 – H <sub>2</sub> O | C16:1/19:1    |
|        |                      | 250.25 | 17:1 – H <sub>2</sub> O | 264.27 | 18:1 – H <sub>2</sub> O | C17:1/18:1    |
|        |                      | 264.27 | 18:1 – H <sub>2</sub> O | 250.25 | 17:1 – H <sub>2</sub> O | C18:1/17:1    |
| 714.51 | d35:1                | 238.25 | 16:0 – H <sub>2</sub> O | 296.29 | 19:1                    | C16:0/19:1    |
|        |                      | 250.25 | 17:1 – H <sub>2</sub> O | 266.28 | 18:0 – H <sub>2</sub> O | C17:1/18:0    |
|        |                      | 264.27 | 18:1 – H <sub>2</sub> O | 252.27 | 17:0 – H <sub>2</sub> O | C18:1/17:0    |
|        |                      | 278.28 | 19:1 – H <sub>2</sub> O | 256.26 | 16:0                    | C19:1/16:0    |
| 716.40 | d35:0 or<br>d34:1–OH | 236.24 | 16:1 – H <sub>2</sub> O | 300.29 | 18:0 – H + OH           | C16:1/18:0–OH |
|        |                      | 252.27 | 17:0 – H <sub>2</sub> O |        |                         | C17:0/18:0    |
|        |                      | 264.27 | 18:1 – H <sub>2</sub> O | 272.26 | 16:0 – H + OH           | C18:1/16:0–OH |
| 726.62 | d36:2                | 236.24 | 16:1 – H <sub>2</sub> O |        |                         | C16:1/20:1    |
|        |                      | 252.27 | 17:0 – H <sub>2</sub> O |        |                         | C17:0/19:2    |
|        |                      | 264.27 | 18:1 – H <sub>2</sub> O | 282.28 | 18:1                    | C18:1/18:1    |
| 728.61 | 36:1                 | 252.68 | 17:0 – H <sub>2</sub> O |        |                         | C17:0/19:1    |
|        |                      | 264.45 | 18:1 – H <sub>2</sub> O | 284.51 | 18:0                    | C18:1/18:0    |
| 738.66 | d37:3                | 224.24 | 15:0 – H <sub>2</sub> O |        |                         | C15:0/22:3    |
|        |                      | 236.24 | 16:1 – H <sub>2</sub> O | 340.36 | 21:2 + H <sub>2</sub> O | C16:1/21:2    |
|        |                      | 264.27 | 18:1 – H <sub>2</sub> O |        |                         | C18:1/19:2    |
| 740.52 | d37:2                | 224.24 | 15:0 – H <sub>2</sub> O | 336.76 | 22:2                    | C15:0/22:2    |
|        |                      | 236.24 | 16:1 – H <sub>2</sub> O |        |                         | C16:1/21:1    |
|        |                      | 250.25 | 17:1 – H <sub>2</sub> O |        |                         | C17:1/20:1    |
|        |                      | 264.27 | 18:1 – H <sub>2</sub> O | 278.28 | 19:1 – H <sub>2</sub> O | C18:1/19:1    |
|        |                      | 278.28 | 19:1 – H <sub>2</sub> O | 264.27 | 18:1 – H <sub>2</sub> O | C19:1/18:1    |
| 744.55 | d37:0 or<br>d36:1–OH | 252.27 | 17:0 – H <sub>2</sub> O |        |                         | C17:0/20:0    |
|        |                      | 264.27 | 18:1 – H <sub>2</sub> O | 300.29 | 18:0 – H + OH           | C18:1/18:0–OH |
| 752.64 | d38:3                | 224.24 | 15:0 – H <sub>2</sub> O |        |                         | C15:0/23:3    |
|        |                      | 236.24 | 16:1 – H <sub>2</sub> O | 354.37 | 22:2 + H <sub>2</sub> O | C16:1/22:2    |
|        |                      | 250.25 | 17:1 – H <sub>2</sub> O | 340.36 | 21:2 + H <sub>2</sub> O | C17:1/21:2    |

|        |                      |        |                         |        |                         |               |
|--------|----------------------|--------|-------------------------|--------|-------------------------|---------------|
|        |                      | 264.27 | 18:1 - H <sub>2</sub> O | 326.34 | 20:2 + H <sub>2</sub> O | C18:1/20:2    |
| 754.65 | d38:2                | 224.24 | 15:0 - H <sub>2</sub> O |        |                         | C15:0/23:2    |
|        |                      | 236.24 | 16:1 - H <sub>2</sub> O | 356.35 | 22:1 + H <sub>2</sub> O | C16:1/22:1    |
| 756.64 | d38:1                | 236.24 | 16:1 - H <sub>2</sub> O | 340.53 | 22:0                    | C16:1/22:0    |
|        |                      | 250.47 | 17:1 - H <sub>2</sub> O |        |                         | C17:1/21:0    |
|        |                      | 264.39 | 18:1 - H <sub>2</sub> O |        |                         | C18:1/20:0    |
| 766.53 | d39:3                | 236.24 | 16:1 - H <sub>2</sub> O | 368.39 | 23:2 + H <sub>2</sub> O | C16:1/23:2    |
|        |                      | 250.25 | 17:1 - H <sub>2</sub> O |        |                         | C17:0/22:3    |
|        |                      | 252.27 | 17:0 - H <sub>2</sub> O | 354.37 | 22:2 + H <sub>2</sub> O | C17:1/22:2    |
|        |                      | 264.27 | 18:1 - H <sub>2</sub> O | 340.36 | 21:2 + H <sub>2</sub> O | C18:1/21:2    |
| 768.55 | d39:2                | 236.24 | 16:1 - H <sub>2</sub> O | 370.37 | 23:1 + H <sub>2</sub> O | C16:1/23:1    |
|        |                      | 250.25 | 17:1 - H <sub>2</sub> O |        |                         | C17:1/22:1    |
|        |                      | 264.27 | 18:1 - H <sub>2</sub> O |        |                         | C18:1/21:1    |
| 770.65 | d39:1                | 236.27 | 16:1 - H <sub>2</sub> O | 354.54 | 23:0                    | C16:1/23:0    |
|        |                      | 250.27 | 17:1 - H <sub>2</sub> O |        |                         | C17:1/22:0    |
|        |                      | 252.37 | 17:0 - H <sub>2</sub> O |        |                         | C17:0/22:1    |
|        |                      | 264.33 | 18:1 - H <sub>2</sub> O | 326.60 | 21:0                    | C18:1/21:0    |
| 772.27 | d38:1-OH             | 236.24 | 16:1 - H <sub>2</sub> O | 356.07 | 22:0 - H + OH           | C16:1/22:0-OH |
|        |                      | 250.25 | 17:1 - H <sub>2</sub> O |        |                         | C17:1/21:0-OH |
|        |                      | 264.27 | 18:1 - H <sub>2</sub> O |        |                         | C18:1/20:0-OH |
| 780.55 | d40:3                | 236.24 | 16:1 - H <sub>2</sub> O |        |                         | C16:1/24:2    |
|        |                      | 252.27 | 17:1 - H <sub>2</sub> O | 368.39 | 23:2 + H <sub>2</sub> O | C17:1/23:2    |
|        |                      | 264.27 | 18:1 - H <sub>2</sub> O | 354.37 | 22:2 + H <sub>2</sub> O | C18:1/22:2    |
| 782.57 | d40:2                | 224.24 | 15:0 - H <sub>2</sub> O | 396.38 | 25:2 + H <sub>2</sub> O | C15:0/25:2    |
|        |                      | 236.24 | 16:1 - H <sub>2</sub> O | 384.38 | 24:1 + H <sub>2</sub> O | C16:1/24:1    |
|        |                      | 250.25 | 17:1 - H <sub>2</sub> O |        |                         | C17:1/23:1    |
|        |                      | 264.27 | 18:1 - H <sub>2</sub> O | 356.35 | 22:1 + H <sub>2</sub> O | C18:1/22:1    |
| 784.66 | d40:1                | 236.24 | 16:1 - H <sub>2</sub> O | 368.29 | 24:0                    | C16:1/24:0    |
|        |                      | 250.25 | 17:1 - H <sub>2</sub> O | 354.37 | 23:0                    | C17:1/23:0    |
|        |                      | 252.27 | 17:0 - H <sub>2</sub> O |        |                         | C17:0/23:1    |
|        |                      | 264.27 | 18:1 - H <sub>2</sub> O | 340.45 | 22:0                    | C18:1/22:0    |
| 786.53 | d40:0 or<br>d39:1-OH | 224.24 | 15:0 - H <sub>2</sub> O |        |                         | C15:0/25:0    |
|        |                      | 236.24 | 16:1 - H <sub>2</sub> O | 370.37 | 23:0 - H + OH           | C16:1/23:0-OH |
|        |                      | 250.25 | 17:1 - H <sub>2</sub> O | 356.35 | 22:0 - H + OH           | C17:1/22:0-OH |
|        |                      | 254.25 | 18:1 - H <sub>2</sub> O |        |                         | C18:1/21:0-OH |
| 794.57 | d41:3                | 352.36 | 23:1                    | 272.26 | 16:0 - H + OH           | C23:1/16:0-OH |
|        |                      | 264.27 | 18:1 - H <sub>2</sub> O | 368.39 | 23:2 - H <sub>2</sub> O | C18:1/23:2    |
| 796.67 | d41:2                | 236.38 | 16:1 - H <sub>2</sub> O |        |                         | C16:1/25:1    |
|        |                      | 250.45 | 17:1 - H <sub>2</sub> O |        |                         | C17:1/24:1    |
|        |                      | 264.42 | 18:1 - H <sub>2</sub> O | 370.73 | 23:1 + H <sub>2</sub> O | C18:1/23:1    |
| 798.69 | d41:1                | 236.22 | 16:1 - H <sub>2</sub> O |        |                         | C16:1/25:0    |
|        |                      | 250.09 | 17:1 - H <sub>2</sub> O |        |                         | C17:1/24:0    |
|        |                      | 264.43 | 18:1 - H <sub>2</sub> O | 354.60 | 23:0                    | C18:1/23:0    |
|        |                      | 278.53 | 19:1 - H <sub>2</sub> O |        |                         | C19:1/22:0    |
| 800.58 | d41:0 or<br>d40:1-OH | 236.24 | 16:1 - H <sub>2</sub> O | 384.38 | 24:0 - H + OH           | C16:1/24:0-OH |
|        |                      | 250.25 | 17:1 - H <sub>2</sub> O |        |                         | C17:1/23:0-OH |



|        |                      |        |                         |        |                         |               |
|--------|----------------------|--------|-------------------------|--------|-------------------------|---------------|
|        |                      | 264.27 | 18:1 – H <sub>2</sub> O | 356.35 | 23:0 – H + OH           | C18:1/22:0–OH |
| 810.75 | d42:2                | 252.27 | 17:0 – H <sub>2</sub> O |        |                         | C17:0/25:2    |
|        |                      | 264.27 | 18:1 – H <sub>2</sub> O | 366.37 | 24:1                    | C18:1/24:1    |
|        |                      | 278.28 | 19:1 – H <sub>2</sub> O |        |                         | C19:1/23:1    |
| 812.62 | d42:1                | 264.34 | 18:1 – H <sub>2</sub> O | 368.29 | 24:0                    | C18:1/24:0    |
|        |                      | 278.55 | 19:1 – H <sub>2</sub> O | 354.68 | 23:0                    | C19:1/23:0    |
|        |                      | 292.11 | 20:1 – H <sub>2</sub> O |        |                         |               |
| 814.56 | d42:0 or<br>d41:1–OH | 236.24 | 16:1 – H <sub>2</sub> O |        |                         | C16:1/25:0–OH |
|        |                      | 238.25 | 16:0 – H <sub>2</sub> O |        |                         | C16:0/26:0    |
|        |                      | 250.25 | 17:1 – H <sub>2</sub> O | 384.38 | 24:0 – H + OH           | C17:1/24:0–OH |
|        |                      | 252.27 | 17:0 – H <sub>2</sub> O |        |                         | C17:0/25:0    |
|        |                      | 264.27 | 18:1 – H <sub>2</sub> O | 370.37 | 23:0 – H + OH           | C18:1/23:0–OH |
|        |                      | 278.28 | 19:1 – H <sub>2</sub> O |        |                         | C19:1/22:0–OH |
|        |                      | 352.36 | 23:1                    | 300.29 | 18:0 – H + OH           | C23:1/18:0–OH |
| 826.71 | d43:1                | 264.34 | 18:1 – H <sub>2</sub> O |        |                         | C18:1/25:0    |
|        |                      | 278.34 | 19:1 – H <sub>2</sub> O | 350.02 | 24:0 – H <sub>2</sub> O | C19:1/24:0    |
|        |                      | 292.02 | 20:1 – H <sub>2</sub> O | 354.36 | 23:0                    | C20:1/23:0    |
| 828.69 | d43:0 or<br>d42:1–OH | 236.24 | 16:1 – H <sub>2</sub> O |        |                         | C16:1/26:0–OH |
|        |                      | 252.27 | 17:0 – H <sub>2</sub> O |        |                         | C17:0/26:0    |
|        |                      | 264.27 | 18:1 – H <sub>2</sub> O | 384.38 | 24:0 – H + OH           | C18:1/24:0–OH |
|        |                      | 278.28 | 19:1 – H <sub>2</sub> O |        |                         | C19:1/23:0–OH |
|        |                      | 366.37 | 24:1 – H <sub>2</sub> O | 300.29 | 18:0 – H + OH           | C23:1/18:0–OH |

**Table S6.** List of LacCer molecular species found in bovine milk with their tentative identification based on observed evidence.

| <i>m/z</i> | <i>d</i> -value      | Backbone<br><i>m/z</i> | Sphingoid<br>Base       | Fatty<br>Amide <i>m/z</i> | Fatty Acid              | Tentative ID  |
|------------|----------------------|------------------------|-------------------------|---------------------------|-------------------------|---------------|
| 862.63     | d34:1                | 236.39                 | 16:1 – H <sub>2</sub> O |                           |                         | C16:1/18:0    |
|            |                      | 264.31                 | 18:1 – H <sub>2</sub> O | 256.43                    | 16:0                    | C18:1/16:0    |
| 864.76     | d34:0 or<br>d33:1–OH | 252.27                 | 17:0 – H <sub>2</sub> O | 252.27                    | 17:0                    | C17:0/17:0    |
|            |                      | 256.26                 | 16:0                    | 284.27                    | 18:0                    | C16:0/18:0    |
|            |                      | 264.27                 | 18:1 – H <sub>2</sub> O |                           |                         | C18:1/15:0–OH |
|            |                      | 284.29                 | 18:0                    | 256.26                    | 16:0                    | C18:0/16:0    |
| 890.65     | d36:1                | 236.24                 | 16:1 – H <sub>2</sub> O |                           |                         | C16:1/20:0    |
|            |                      | 256.26                 | 16:0                    |                           |                         | C16:0/20:1    |
|            |                      | 264.27                 | 18:1 – H <sub>2</sub> O | 284.29                    | 18:0                    | C18:1/18:0    |
| 914.69     | d38:3                | 224.24                 | 15:0 – H <sub>2</sub> O |                           |                         | C15:0/23:3    |
|            |                      | 236.24                 | 16:1 – H <sub>2</sub> O | 354.37                    | 22:2 + H <sub>2</sub> O | C16:1/22:2    |
|            |                      | 250.25                 | 17:1 – H <sub>2</sub> O | 340.36                    | 21:2 + H <sub>2</sub> O | C17:1/21:2    |
| 918.69     | d38:1                | 264.27                 | 18:1 – H <sub>2</sub> O | 290.28                    | 20:2 – H <sub>2</sub> O | C18:1/20:2    |
|            |                      | 224.24                 | 15:0 – H <sub>2</sub> O | 352.95                    | 23:1                    | C15:1/23:1    |
|            |                      | 236.24                 | 16:1 – H <sub>2</sub> O | 340.36                    | 22:0                    | C16:1/22:0    |
|            |                      | 264.27                 | 18:1 – H <sub>2</sub> O | 358.70                    | 22:0 + H <sub>2</sub> O | C18:1/20:0    |
| 920.82     | d38:0 or<br>d37:1–OH | 274.27                 | 16:0 + H <sub>2</sub> O |                           |                         | C16:0/22:1    |
|            |                      | 236.24                 | 16:1 – H <sub>2</sub> O |                           |                         | C16:1/21:0–OH |
|            |                      | 256.26                 | 16:0                    | 340.36                    | 22:0                    | C16:0/22:0    |

|         |                      |        |                         |        |                         |               |
|---------|----------------------|--------|-------------------------|--------|-------------------------|---------------|
| 928.71  | d39:3                | 224.24 | 15:0 - H <sub>2</sub> O |        |                         | C15:0/24:3    |
|         |                      | 236.24 | 16:1 - H <sub>2</sub> O | 368.39 | 23:2 + H <sub>2</sub> O | C16:1/23:2    |
|         |                      | 250.25 | 17:1 - H <sub>2</sub> O | 354.37 | 22:2 + H <sub>2</sub> O | C17:1/22:2    |
|         |                      | 264.27 | 18:1 - H <sub>2</sub> O | 340.36 | 21:2 + H <sub>2</sub> O | C18:1/21:2    |
| 932.70  | d39:1                | 224.24 | 15:0 - H <sub>2</sub> O |        |                         | C15:0/24:1    |
|         |                      | 236.24 | 16:1 - H <sub>2</sub> O | 354.37 | 23:0                    | C16:1/23:0    |
|         |                      | 250.25 | 17:1 - H <sub>2</sub> O | 340.36 | 22:0                    | C17:1/22:0    |
|         |                      | 256.26 | 16:0                    | 352.36 | 23:1                    | C16:0/23:1    |
| 934.72  | d39:0 or<br>d38:1-OH | 264.27 | 18:1 - H <sub>2</sub> O | 326.34 | 21:0                    | C18:1/21:0    |
|         |                      | 224.24 | 15:0 - H <sub>2</sub> O | 386.12 | 24:0 + H <sub>2</sub> O | C15:0/24:0    |
|         |                      | 236.24 | 16:1 - H <sub>2</sub> O |        |                         | C16:1/22:0-OH |
|         |                      | 250.25 | 17:1 - H <sub>2</sub> O |        |                         | C17:1/21:0-OH |
|         |                      | 256.26 | 16:0                    | 354.37 | 23:0                    | C16:0/23:0    |
| 942.64  | d40:3                | 270.28 | 17:0                    | 340.36 | 22:0                    | C17:0/22:0    |
|         |                      | 284.29 | 18:0                    |        |                         | C18:0/21:0    |
|         |                      | 236.24 | 16:1 - H <sub>2</sub> O |        |                         | C16:1/24:2    |
|         |                      | 250.25 | 17:1 - H <sub>2</sub> O |        |                         | C17:1/23:2    |
| 946.72  | d40:1                | 252.27 | 17:0 - H <sub>2</sub> O | 366.37 | 23:3 + H <sub>2</sub> O | C17:0/23:3    |
|         |                      | 264.27 | 18:1 - H <sub>2</sub> O | 354.37 | 22:2 + H <sub>2</sub> O | C18:1/22:2    |
|         |                      | 236.37 | 16:1 - H <sub>2</sub> O | 368.62 | C24:0                   | C16:1/24:0    |
|         |                      | 250.14 | 17:1 - H <sub>2</sub> O |        |                         | C17:1/23:0    |
| 948.73  | d40:0 or<br>d39:1-OH | 252.39 | 17:0 - H <sub>2</sub> O | 370.46 | 23:1 - H <sub>2</sub> O | C17:0/23:1    |
|         |                      | 264.26 | 18:1 - H <sub>2</sub> O | 340.49 | 22:0                    | C18:1/22:0    |
|         |                      | 236.24 | 16:1 - H <sub>2</sub> O |        |                         | C16:1/23:0-OH |
|         |                      | 256.26 | 16:0                    | 368.39 | 24:0                    | C16:0/24:0    |
| 960.74  | d41:1                | 264.27 | 18:1 - H <sub>2</sub> O |        |                         | C18:1/21:0-OH |
|         |                      | 284.29 | 18:0                    | 340.36 | 22:0                    | C18:0/22:0    |
|         |                      | 236.47 | 16:1 - H <sub>2</sub> O |        |                         | C16:1/25:0    |
|         |                      | 250.27 | 17:1 - H <sub>2</sub> O | 386.12 | 24:0 + H <sub>2</sub> O | C17:1/24:0    |
|         |                      | 252.27 | 17:0 - H <sub>2</sub> O |        |                         | C17:0/24:1    |
| 974.75  | d42:1                | 264.27 | 18:1 - H <sub>2</sub> O | 354.37 | 23:0                    | C18:1/23:0    |
|         |                      | 278.28 | 19:1 - H <sub>2</sub> O |        |                         | C19:1/22:0    |
|         |                      | 236.24 | 16:1 - H <sub>2</sub> O |        |                         | C16:1/26:0    |
|         |                      | 252.27 | 17:0 - H <sub>2</sub> O |        |                         | C17:1/25:0    |
|         |                      | 264.27 | 18:1 - H <sub>2</sub> O | 368.39 | 24:0                    | C18:1/24:0    |
|         |                      | 278.28 | 19:1 - H <sub>2</sub> O | 354.37 | 23:0                    | C19:1/23:0    |
| 988.77  | d43:1                | 284.29 | 18:0                    | 366.37 | 24:1                    | C18:0/24:1    |
|         |                      | 292.30 | 20:1 - H <sub>2</sub> O | 340.36 | 22:0                    | C20:1/22:0    |
|         |                      | 252.27 | 17:0 - H <sub>2</sub> O |        |                         | C17:0/26:1    |
|         |                      | 264.27 | 18:1 - H <sub>2</sub> O | 382.40 | 25:0                    | C18:1/25:0    |
| 992.76  | d44:6                | 278.28 | 19:1 - H <sub>2</sub> O | 368.39 | 24:0                    | C19:1/24:0    |
|         |                      | 292.30 | 20:1 - H <sub>2</sub> O |        |                         | C20:1/23:0    |
|         |                      | 264.27 | 18:1 - H <sub>2</sub> O |        |                         | C18:1/26:5    |
| 1002.78 | d44:1                | 300.29 | 21:4 - H <sub>2</sub> O | 368.39 | 23:2 + H <sub>2</sub> O | C21:4/23:2    |
|         |                      | 318.30 | 22:2 - H <sub>2</sub> O |        |                         | C22:2/22:4    |
|         |                      | 252.27 | 17:0 - H <sub>2</sub> O |        |                         | C17:0/27:1    |

|        |                         |            |
|--------|-------------------------|------------|
| 264.27 | 18:1 – H <sub>2</sub> O | C18:1/26:0 |
| 278.28 | 19:1 – H <sub>2</sub> O | C19:1/25:0 |
| 292.30 | 20:1 – H <sub>2</sub> O | C20:1/24:0 |

**Table S7.** List of Crb molecular species found in MFGM Lipid 100 with their tentative identification based on observed evidence.

| <i>m/z</i> | <i>d-value</i>       | <b>Backbone<br/><i>m/z</i></b> | <b>Sphingoid<br/>Base</b> | <b>Fatty<br/>Amide <i>m/z</i></b> | <b>Fatty Acid</b>       | <b>Tentative ID</b> |
|------------|----------------------|--------------------------------|---------------------------|-----------------------------------|-------------------------|---------------------|
| 654.36     | d31:3                | 224.24                         | 15:0 – H <sub>2</sub> O   | 250.25                            | 16:3                    | C15:0/16:3          |
|            |                      | 236.24                         | 16:1 – H <sub>2</sub> O   | 256.26                            | 15:2 + H <sub>2</sub> O | C16:1/15:2          |
|            |                      | 264.27                         | 18:1 – H <sub>2</sub> O   | 228.23                            | 13:2 + H <sub>2</sub> O | C18:1/13:2          |
| 668.54     | d32:3                | 236.24                         | 16:1 – H <sub>2</sub> O   | 252.27                            | 16:2                    | C16:1/16:2          |
|            |                      | 238.25                         | 16:0 – H <sub>2</sub> O   | 268.26                            | 16:3 + H <sub>2</sub> O | C16:0/16:3          |
|            |                      | 250.25                         | 17:1 – H <sub>2</sub> O   | 238.25                            | 15:2                    | C17:1/15:2          |
|            |                      | 264.27                         | 18:1 – H <sub>2</sub> O   | 242.25                            | 14:2                    | C18:1/14:2          |
| 670.56     | d32:2                | 236.24                         | 16:1 – H <sub>2</sub> O   | 236.24                            | 16:1 – H <sub>2</sub> O | C16:1/16:1          |
|            |                      | 250.25                         | 17:1 – H <sub>2</sub> O   | 240.24                            | 15:1                    | C17:1/15:1          |
|            |                      | 264.27                         | 18:1 – H <sub>2</sub> O   |                                   |                         | C18:1/14:1          |
| 672.37     | d32:1                | 224.24                         | 15:0 – H <sub>2</sub> O   | 250.25                            | 17:1                    | C15:0/17:1          |
|            |                      | 236.24                         | 16:1 – H <sub>2</sub> O   | 256.26                            | 16:0                    | C16:1/16:0          |
|            |                      | 264.27                         | 18:1 – H <sub>2</sub> O   |                                   |                         | C18:1/14:0          |
| 674.48     | d32:0 or<br>d31:1–OH | 236.24                         | 16:1 – H <sub>2</sub> O   |                                   |                         | C16:1/15:0–OH       |
|            |                      | 256.26                         | 16:0                      | 256.26                            | 16:0                    | C16:0/16:0          |
|            |                      | 264.27                         | 18:1 – H <sub>2</sub> O   |                                   |                         | C18:1/13:0–OH       |
|            |                      | 278.28                         | 19:1 – H <sub>2</sub> O   |                                   |                         | C19:1/12:0–OH       |
| 682.56     | d33:3                | 236.24                         | 16:1 – H <sub>2</sub> O   | 266.28                            | 17:2                    | C16:1/17:2          |
|            |                      | 252.27                         | 17:0 – H <sub>2</sub> O   | 250.25                            | 16:3                    | C17:0/16:3          |
|            |                      | 264.27                         | 18:1 – H <sub>2</sub> O   | 256.26                            | 15:2 + H <sub>2</sub> O | C18:1/15:2          |
| 686.51     | d33:1                | 238.25                         | 16:0 – H <sub>2</sub> O   | 268.26                            | 17:1                    | C16:0/17:1          |
|            |                      | 250.25                         | 17:1 – H <sub>2</sub> O   | 256.26                            | 16:0                    | C17:1/16:0          |
|            |                      | 264.27                         | 18:1 – H <sub>2</sub> O   |                                   |                         | C18:1/15:0          |
|            |                      |                                |                           |                                   |                         |                     |
| 698.66     | d34:2                | 236.24                         | 16:1 – H <sub>2</sub> O   | 282.28                            | 18:1                    | C16:1/18:1          |
|            |                      | 252.27                         | 17:0 – H <sub>2</sub> O   | 266.28                            | 17:2                    | C17:0/17:2          |
|            |                      | 264.27                         | 18:1 – H <sub>2</sub> O   | 254.25                            | 16:1                    | C18:1/16:1          |
| 700.58     | d34:1                | 264.34                         | 18:1 – H <sub>2</sub> O   | 256.35                            | 16:0                    | C18:1/16:0          |
| 702.50     | d34:0 or<br>d33:1–OH | 240.10                         | 15:1 – H <sub>2</sub> O   | 300.06                            | 18:0 – H + OH           | C15:1/18:0–OH       |
|            |                      | 250.25                         | 17:1 – H <sub>2</sub> O   | 272.26                            | 16:0 – H + OH           | C17:1/16:0–OH       |
|            |                      | 256.26                         | 16:0 – H <sub>2</sub> O   | 284.29                            | 18:0                    | C16:0/18:0          |
|            |                      | 264.27                         | 18:1 – H <sub>2</sub> O   |                                   |                         | C18:1/15:0–OH       |
| 710.59     | d35:3                | 236.24                         | 16:1 – H <sub>2</sub> O   |                                   |                         | C16:1/19:2          |
|            |                      | 252.27                         | 17:0 – H <sub>2</sub> O   | 278.28                            | 18:3                    | C17:0/18:3          |
|            |                      | 264.27                         | 18:1 – H <sub>2</sub> O   | 284.29                            | 17:2 + H <sub>2</sub> O | C18:1/17:2          |
| 712.57     | d35:2                | 250.25                         | 17:1 – H <sub>2</sub> O   | 264.27                            | 18:1 – H <sub>2</sub> O | C17:1/18:1          |
|            |                      | 264.27                         | 18:1 – H <sub>2</sub> O   | 250.25                            | 17:1 – H <sub>2</sub> O | C18:1/17:1          |
|            |                      | 278.28                         | 19:1 – H <sub>2</sub> O   |                                   |                         | C19:1/16:1          |
| 714.59     | d35:1                | 250.25                         | 17:1 – H <sub>2</sub> O   | 266.28                            | 18:0 – H <sub>2</sub> O | C17:1/18:0          |

|        |                      |        |                         |        |                         |               |
|--------|----------------------|--------|-------------------------|--------|-------------------------|---------------|
|        |                      | 264.27 | 18:1 - H <sub>2</sub> O | 252.27 | 17:0 - H <sub>2</sub> O | C18:1/17:0    |
|        |                      | 278.28 | 19:1 - H <sub>2</sub> O | 256.26 | 16:0                    | C19:1/16:0    |
| 716.41 | d35:0 or<br>d34:1-OH | 236.24 | 16:1 - H <sub>2</sub> O | 300.29 | 18:0 - H + OH           | C16:1/18:0-OH |
|        |                      | 252.27 | 17:0 - H <sub>2</sub> O | 284.29 | 18:0                    | C17:0/18:0    |
|        |                      | 264.27 | 18:1 - H <sub>2</sub> O | 272.26 | 16:0 - H + OH           | C18:1/16:0-OH |
| 726.54 | d36:2                | 252.27 | 17:0 - H <sub>2</sub> O |        |                         | C17:0/19:2    |
|        |                      | 264.27 | 18:1 - H <sub>2</sub> O | 282.28 | 18:1                    | C18:1/18:1    |
| 728.41 | d36:1                | 236.24 | 16:1 - H <sub>2</sub> O | 312.33 | 20:0                    | C16:1/20:0    |
|        |                      | 252.27 | 17:0 - H <sub>2</sub> O | 278.29 | 19:1 - H <sub>2</sub> O | C17:0/19:1    |
|        |                      | 264.27 | 18:1 - H <sub>2</sub> O | 284.29 | 18:0                    | C18:1/18:0    |
|        |                      | 292.30 | 20:1 - H <sub>2</sub> O |        |                         | C20:1/16:0    |
| 730.53 | d36:0 or<br>d35:1-OH | 250.25 | 17:1 - H <sub>2</sub> O |        |                         | C17:1/18:0-OH |
|        |                      | 252.27 | 17:0 - H <sub>2</sub> O | 298.55 | 19:0                    | C17:0/19:0    |
|        |                      | 264.27 | 18:1 - H <sub>2</sub> O |        |                         | C18:1/17:0-OH |
|        |                      | 278.29 | 19:1 - H <sub>2</sub> O |        |                         | C19:1/16:0-OH |
| 736.41 | d37:4                | 224.24 | 15:0 - H <sub>2</sub> O | 314.28 | 22:4 - H <sub>2</sub> O | C15:0/22:4    |
|        |                      | 236.24 | 16:1 - H <sub>2</sub> O |        |                         | C16:1/21:3    |
|        |                      | 262.25 | 18:2 - H <sub>2</sub> O |        |                         | C18:2/19:2    |
|        |                      | 264.27 | 18:1 - H <sub>2</sub> O |        |                         | C18:1/19:3    |
| 738.50 | d37:3                | 224.24 | 15:0 - H <sub>2</sub> O |        |                         | C15:0/22:3    |
|        |                      | 236.24 | 16:1 - H <sub>2</sub> O | 340.36 | 21:2 + H <sub>2</sub> O | C16:1/21:2    |
|        |                      | 264.27 | 18:1 - H <sub>2</sub> O | 312.33 | 19:2 + H <sub>2</sub> O | C18:1/19:2    |
| 740.52 | d37:2                | 236.24 | 16:1 - H <sub>2</sub> O |        |                         | C16:1/21:1    |
|        |                      | 264.27 | 18:1 - H <sub>2</sub> O | 278.28 | 19:1 - H <sub>2</sub> O | C18:1/19:1    |
|        |                      | 278.28 | 19:1 - H <sub>2</sub> O | 264.27 | 18:1 - H <sub>2</sub> O | C19:1/18:1    |
| 744.55 | d37:0 or<br>d36:1-OH | 236.24 | 16:1 - H <sub>2</sub> O |        |                         | C16:1/20:0-OH |
|        |                      | 252.27 | 17:0 - H <sub>2</sub> O |        |                         | C17:0/20:0    |
|        |                      | 264.27 | 18:1 - H <sub>2</sub> O | 300.29 | 18:0 - H + OH           | C18:1/18:0-OH |
| 752.63 | d38:3                | 224.24 | 15:0 - H <sub>2</sub> O |        |                         | C15:0/23:3    |
|        |                      | 236.24 | 16:1 - H <sub>2</sub> O | 354.37 | 22:2 + H <sub>2</sub> O | C16:1/22:2    |
|        |                      | 250.25 | 17:1 - H <sub>2</sub> O | 340.36 | 21:2 + H <sub>2</sub> O | C17:1/21:2    |
|        |                      | 264.27 | 18:1 - H <sub>2</sub> O | 326.34 | 20:2 + H <sub>2</sub> O | C18:1/20:2    |
| 754.53 | d38:2                | 224.24 | 15:0 - H <sub>2</sub> O |        |                         | C15:0/23:2    |
|        |                      | 236.24 | 16:1 - H <sub>2</sub> O | 356.35 | 22:1 + H <sub>2</sub> O | C16:1/22:1    |
|        |                      | 250.25 | 17:1 - H <sub>2</sub> O |        |                         | C17:1/21:1    |
|        |                      | 264.27 | 18:1 - H <sub>2</sub> O |        |                         | C18:1/20:1    |
| 756.55 | d38:1                | 224.24 | 15:0 - H <sub>2</sub> O |        |                         | C15:0/23:1    |
|        |                      | 236.24 | 16:1 - H <sub>2</sub> O | 340.36 | 22:0                    | C16:1/22:0    |
|        |                      | 250.25 | 17:1 - H <sub>2</sub> O |        |                         | C17:1/21:0    |
|        |                      | 256.26 | 16:0                    |        |                         | C16:0/22:1    |
|        |                      | 264.27 | 18:1 - H <sub>2</sub> O | 312.33 | 20:0                    | C18:1/20:0    |
| 766.53 | d39:3                | 236.24 | 16:1 - H <sub>2</sub> O | 368.39 | 23:2 + H <sub>2</sub> O | C16:1/23:2    |
|        |                      | 250.25 | 17:1 - H <sub>2</sub> O | 354.37 | 22:2 + H <sub>2</sub> O | C17:1/22:2    |
|        |                      | 264.27 | 18:1 - H <sub>2</sub> O | 340.36 | 21:2 + H <sub>2</sub> O | C18:1/21:2    |
| 768.55 | d39:2                | 224.24 | 15:0 - H <sub>2</sub> O | 282.37 | 24:2 + H <sub>2</sub> O | C15:0/24:2    |
|        |                      | 236.24 | 16:1 - H <sub>2</sub> O | 370.37 | 23:1 + H <sub>2</sub> O | C16:1/23:1    |

|        |                      |        |                         |               |                         |               |
|--------|----------------------|--------|-------------------------|---------------|-------------------------|---------------|
|        |                      | 250.25 | 17:1 - H <sub>2</sub> O | 356.35        | 22:1 + H <sub>2</sub> O | C17:1/22:1    |
|        |                      | 264.27 | 18:1 - H <sub>2</sub> O |               |                         | C18:1/21:1    |
| 770.57 | d39:1                | 224.24 | 15:0 - H <sub>2</sub> O |               |                         | C15:0/24:0    |
|        |                      | 236.24 | 16:1 - H <sub>2</sub> O | 354.37        | 23:0                    | C16:1/23:0    |
|        |                      | 250.25 | 17:1 - H <sub>2</sub> O | 340.36        | 22:0                    | C17:1/22:0    |
|        |                      | 264.27 | 18:1 - H <sub>2</sub> O | 326.34        | 21:0                    | C18:1/21:0    |
|        |                      |        |                         |               |                         |               |
| 772.58 | d39:0 or<br>d38:1-OH | 224.24 | 15:0 - H <sub>2</sub> O |               |                         | C15:0/24:0    |
|        |                      | 236.24 | 16:1 - H <sub>2</sub> O | 356.35        | 22:0 - H + OH           | C16:1/22:0-OH |
|        |                      | 264.27 | 18:1 - H <sub>2</sub> O |               |                         | C18:1/20:0-OH |
| 780.67 | d40:3                | 236.24 | 16:1 - H <sub>2</sub> O |               |                         | C16:1/24:2    |
|        |                      | 250.25 | 17:1 - H <sub>2</sub> O | 368.39        | 23:2 + H <sub>2</sub> O | C17:1/23:2    |
|        |                      | 252.27 | 17:0 - H <sub>2</sub> O |               |                         | C17:0/23:3    |
|        |                      | 264.27 | 18:1 - H <sub>2</sub> O | 354.37        | 22:2 + H <sub>2</sub> O | C18:1/22:2    |
|        |                      | 278.28 | 19:1 - H <sub>2</sub> O | 340.36        | 21:2 + H <sub>2</sub> O | C19:1/21:2    |
| 782.56 | d40:2                | 224.24 | 15:0 - H <sub>2</sub> O |               |                         | C15:0/25:2    |
|        |                      | 236.24 | 16:1 - H <sub>2</sub> O | 384.38        | 24:1 + H <sub>2</sub> O | C16:1/24:1    |
|        |                      | 250.25 | 17:1 - H <sub>2</sub> O | 270.37        | 23:1 + H <sub>2</sub> O | C17:1/23:1    |
|        |                      | 264.27 | 18:1 - H <sub>2</sub> O | 356.35        | 22:1 + H <sub>2</sub> O | C18:1/22:1    |
| 784.66 | d40:1                | 236.40 | 16:1 - H <sub>2</sub> O | 368.50        | 24:0                    | C16:1/24:0    |
|        |                      | 264.34 | 18:1 - H <sub>2</sub> O | 340.36        | 22:0                    | C18:1/22:0    |
| 786.53 | d40:0 or<br>d39:1-H  | 224.24 | 15:0 - H <sub>2</sub> O | 382.36        | 25:0                    | C15:0/25:0    |
|        |                      | 236.24 | 16:1 - H <sub>2</sub> O | 370.37        | 23:0 - H + OH           | C16:1/23:0-OH |
|        |                      | 250.25 | 17:1 - H <sub>2</sub> O | 356.35        | 22:0 - H + OH           | C17:1/22:0-OH |
|        |                      | 264.27 | 18:1 - H <sub>2</sub> O |               |                         | C18:1/21:0-OH |
| 794.56 | d41:3                | 252.27 | 17:0 - H <sub>2</sub> O |               |                         | C17:0/24:3    |
|        |                      | 264.27 | 18:1 - H <sub>2</sub> O | 368.39        | 23:2 + H <sub>2</sub> O | C18:1/23:2    |
|        |                      | 278.28 | 19:1 - H <sub>2</sub> O | 354.37        | 22:2 + H <sub>2</sub> O | C19:1/22:2    |
| 796.66 | d41:2                | 252.27 | 17:0 - H <sub>2</sub> O |               |                         | C17:0/24:2    |
|        |                      | 264.27 | 18:1 - H <sub>2</sub> O | 352.36        | 23:1                    | C18:1/23:1    |
|        |                      | 278.28 | 19:1 - H <sub>2</sub> O | 356.35        | 22:1 + H <sub>2</sub> O | C19:1/22:1    |
| 798.68 | d41:1                | 250.33 | 17:1 - H <sub>2</sub> O |               |                         | C17:1/24:0    |
|        |                      | 264.40 | 18:1 - H <sub>2</sub> O | 354.60        | 23:0                    | C18:1/23:0    |
|        |                      | 278.35 | 19:1 - H <sub>2</sub> O |               |                         | C19:1/22:0    |
| 800.58 | d41:0 or<br>d40:1-OH | 224.24 | 15:0 - H <sub>2</sub> O |               |                         | C15:0/26:0    |
|        |                      | 236.24 | 16:1 - H <sub>2</sub> O | 384.38        | 24:0 - H + OH           | C16:1/24:0-OH |
|        |                      | 250.25 | 17:1 - H <sub>2</sub> O | 370.37        | 23:0 - H + OH           | C17:1/23:0-OH |
|        |                      | 252.27 | 17:0 - H <sub>2</sub> O |               |                         | C17:0/24:0    |
|        |                      | 256.26 | 16:0                    |               |                         | C16:0/25:0    |
|        |                      | 264.27 | 18:1 - H <sub>2</sub> O | 356.35        | 22:0 - H + OH           | C18:1/22:0-OH |
|        |                      | 278.29 | 19:1 - H <sub>2</sub> O |               |                         | C19:1/21:0-OH |
|        |                      | 338.34 | 22:1                    | 300.29        | 18:0 - H + OH           | C22:1/18:0-OH |
| 366.37 | 24:1                 | 272.26 | 16:0 - H + OH           | C24:1/16:0-OH |                         |               |
| 810.68 | d42:2                | 236.24 | 16:1 - H <sub>2</sub> O | 394.36        | 26:1                    | C16:1/26:1    |
|        |                      | 252.27 | 17:0 - H <sub>2</sub> O | 396.39        | 25:2 + H <sub>2</sub> O | C17:0/25:2    |
|        |                      | 264.27 | 18:1 - H <sub>2</sub> O | 366.37        | 24:1                    | C18:1/24:1    |
|        |                      | 278.28 | 19:1 - H <sub>2</sub> O | 352.36        | 23:1                    | C19:1/23:1    |

|        |                      |        |                         |        |                         |               |
|--------|----------------------|--------|-------------------------|--------|-------------------------|---------------|
|        |                      | 292.30 | 20:1 – H <sub>2</sub> O |        |                         | C20:1/22:1    |
| 812.54 | d42:1                | 236.24 | 16:1 – H <sub>2</sub> O | 378.58 | 26:0 – H <sub>2</sub> O | C16:1/26:0    |
|        |                      | 250.25 | 17:1 – H <sub>2</sub> O |        |                         | C17:1/25:0    |
|        |                      | 252.27 | 17:0 – H <sub>2</sub> O |        |                         | C17:0/25:1    |
|        |                      | 264.27 | 18:1 – H <sub>2</sub> O | 368.39 | 24:0                    | C18:1/24:0    |
|        |                      | 278.28 | 19:1 – H <sub>2</sub> O | 354.37 | 23:0                    | C19:1/23:0    |
|        |                      | 292.30 | 20:1 – H <sub>2</sub> O |        |                         | C20:1/22:0    |
| 814.60 | d42:0 or<br>d41:1–OH | 236.24 | 16:1 – H <sub>2</sub> O |        |                         | C16:1/25:0–OH |
|        |                      | 252.27 | 17:0 – H <sub>2</sub> O |        |                         | C17:0/25:0    |
|        |                      | 264.27 | 18:1 – H <sub>2</sub> O | 384.38 | 24:0 – H + OH           | C18:1/24:0–OH |
|        |                      | 278.28 | 19:1 – H <sub>2</sub> O | 370.37 | 23:0 – H + OH           | C19:1/23:0–OH |
| 824.76 | d43:2                | 252.27 | 17:0 – H <sub>2</sub> O |        |                         | C17:0/26:2    |
|        |                      | 264.27 | 18:1 – H <sub>2</sub> O | 380.39 | 25:1                    | C18:1/25:1    |
|        |                      | 278.28 | 19:1 – H <sub>2</sub> O | 366.37 | 24:1                    | C19:1/24:1    |
|        |                      | 292.30 | 20:1 – H <sub>2</sub> O |        |                         | C20:1/23:1    |
| 826.60 | d43:1                | 250.25 | 17:1 – H <sub>2</sub> O |        |                         | C17:1/26:0    |
|        |                      | 252.27 | 17:0 – H <sub>2</sub> O |        |                         | C17:0/26:1    |
|        |                      | 264.27 | 18:1 – H <sub>2</sub> O | 382.40 | 25:0                    | C18:1/25:0    |
|        |                      | 278.28 | 19:1 – H <sub>2</sub> O | 368.39 | 24:0                    | C19:1/24:0    |
|        |                      | 292.30 | 20:1 – H <sub>2</sub> O | 354.37 | 23:0                    | C20:1/23:0    |
| 828.65 | d43:0 or<br>d42:1–OH | 236.24 | 16:1 – H <sub>2</sub> O |        |                         | C16:1/26:0–OH |
|        |                      | 250.25 | 17:1 – H <sub>2</sub> O |        |                         | C17:1/25:0–OH |
|        |                      | 252.27 | 17:0 – H <sub>2</sub> O | 396.38 | 26:0                    | C17:0/26:0    |
|        |                      | 264.27 | 18:1 – H <sub>2</sub> O | 384.38 | 24:0 – H + OH           | C18:1/24:0–OH |
|        |                      | 278.28 | 19:1 – H <sub>2</sub> O | 370.37 | 23:0 – H + OH           | C19:1/23:0–OH |
|        |                      | 292.30 | 20:1 – H <sub>2</sub> O |        |                         | C20:1/22:0–OH |
| 838.78 | d44:2                | 366.37 | 24:1 – H <sub>2</sub> O | 300.29 | 18:0 – H + OH           | C24:1/18:0–OH |
|        |                      | 252.27 | 17:0 – H <sub>2</sub> O |        |                         | C17:0/27:2    |
|        |                      | 264.27 | 18:1 – H <sub>2</sub> O | 412.42 | 26:1 + H <sub>2</sub> O | C18:1/26:1    |
|        |                      | 278.28 | 19:1 – H <sub>2</sub> O |        |                         | C19:1/25:1    |
| 840.64 | d44:1                | 292.30 | 20:1 – H <sub>2</sub> O |        |                         | C20:1/24:1    |
|        |                      | 252.27 | 17:0 – H <sub>2</sub> O |        |                         | C17:0/27:1    |
|        |                      | 264.27 | 18:1 – H <sub>2</sub> O |        |                         | C18:1/26:0    |
|        |                      | 278.30 | 19:1 – H <sub>2</sub> O | 400.98 | 25:0 + H <sub>2</sub> O | C19:1/25:0    |
|        |                      | 292.30 | 20:1 – H <sub>2</sub> O | 368.39 | 24:0                    | C20:1/24:0    |

**Table S8.** List of LacCer molecular species found in MFGM Lipid 100 with their tentative identification based on observed evidence.

| <i>m/z</i> | d-value              | Backbone<br><i>m/z</i> | Sphingoid<br>Base       | Fatty<br>Amide <i>m/z</i> | Fatty Acid | Tentative ID  |
|------------|----------------------|------------------------|-------------------------|---------------------------|------------|---------------|
| 862.62     | d34:1                | 236.24                 | 16:1 – H <sub>2</sub> O |                           |            | C16:1/18:0    |
|            |                      | 252.27                 | 17:0 – H <sub>2</sub> O |                           |            | C17:0/17:1    |
|            |                      | 264.27                 | 18:1 – H <sub>2</sub> O | 256.26                    | 16:0       | C18:1/16:0    |
| 864.63     | d34:0 or<br>d33:1–OH | 256.26                 | 16:0                    | 284.29                    | 18:0       | C16:0/18:0    |
|            |                      | 264.27                 | 18:1 – H <sub>2</sub> O |                           |            | C18:1/15:0–OH |
|            |                      | 284.29                 | 18:0                    | 256.26                    | 16:0       | C18:0/16:0    |

|        |                      |        |                         |        |                         |               |
|--------|----------------------|--------|-------------------------|--------|-------------------------|---------------|
| 876.59 | d35:1                | 250.25 | 17:1 – H <sub>2</sub> O | 284.29 | 18:0                    | C17:1/18:0    |
|        |                      | 264.27 | 18:1 – H <sub>2</sub> O | 270.28 | 17:0                    | C18:1/17:0    |
|        |                      | 278.28 | 19:1 – H <sub>2</sub> O | 274.07 | 16:0 + H <sub>2</sub> O | C19:1/16:0    |
| 890.65 | d36:1                | 236.24 | 16:1 – H <sub>2</sub> O | 312.32 | 20:0                    | C16:1/20:0    |
|        |                      | 252.27 | 17:0 – H <sub>2</sub> O |        |                         | C17:0/19:1    |
|        |                      | 264.27 | 18:1 – H <sub>2</sub> O | 284.29 | 18:0                    | C18:1/18:0    |
| 900.55 | d37:3                | 224.24 | 15:0 – H <sub>2</sub> O |        |                         | C15:0/22:3    |
|        |                      | 236.24 | 16:1 – H <sub>2</sub> O | 340.36 | 21:2 + H <sub>2</sub> O | C16:1/21:2    |
|        |                      | 264.27 | 18:1 – H <sub>2</sub> O |        |                         | C18:1/19:2    |
| 914.69 | d38:3                | 224.24 | 15:0 – H <sub>2</sub> O |        |                         | C15:0/23:3    |
|        |                      | 236.24 | 16:1 – H <sub>2</sub> O | 354.37 | 22:2 + H <sub>2</sub> O | C16:1/22:2    |
|        |                      | 250.25 | 17:1 – H <sub>2</sub> O | 340.36 | 21:2 + H <sub>2</sub> O | C17:1/21:2    |
|        |                      | 264.27 | 18:1 – H <sub>2</sub> O | 326.34 | 20:2 + H <sub>2</sub> O | C18:1/20:2    |
| 916.59 | d38:2                | 236.24 | 16:1 – H <sub>2</sub> O |        |                         | C16:1/22:1    |
|        |                      | 256.26 | 16:0                    | 318.08 | 22:2 – H <sub>2</sub> O | C16:0/22:2    |
|        |                      | 264.27 | 18:1 – H <sub>2</sub> O |        |                         | C18:1/20:1    |
| 918.69 | d38:1                | 224.38 | 15:0 – H <sub>2</sub> O |        |                         | C15:0/23:1    |
|        |                      | 236.27 | 16:1 – H <sub>2</sub> O | 340.63 | 22:0                    | C16:1/22:0    |
|        |                      | 238.52 | 16:0 – H <sub>2</sub> O |        |                         | C16:0/22:1    |
|        |                      | 264.52 | 18:1 – H <sub>2</sub> O |        |                         | C18:1/20:0    |
|        |                      | 266.72 | 18:0 – H <sub>2</sub> O |        |                         | C18:0/20:1    |
| 920.82 | d38:0 or<br>d37:1–OH | 236.24 | 16:1 – H <sub>2</sub> O |        |                         | C16:1/21:0–OH |
|        |                      | 256.26 | 16:0                    | 340.36 | 22:0                    | C16:0/22:0    |
|        |                      | 264.27 | 18:1 – H <sub>2</sub> O |        |                         | C18:1/19:0–OH |
|        |                      | 284.29 | 18:0                    |        |                         | C18:0/20:0    |
| 928.70 | d39:3                | 224.24 | 15:0 – H <sub>2</sub> O |        |                         | C15:0/24:3    |
|        |                      | 236.24 | 16:1 – H <sub>2</sub> O | 368.39 | 23:2 + H <sub>2</sub> O | C16:1/23:2    |
|        |                      | 250.25 | 17:1 – H <sub>2</sub> O | 354.37 | 22:2 + H <sub>2</sub> O | C17:1/22:2    |
|        |                      | 264.27 | 18:1 – H <sub>2</sub> O | 340.36 | 21:2 + H <sub>2</sub> O | C18:1/21:2    |
| 932.70 | d39:1                | 236.36 | 16:1 – H <sub>2</sub> O |        |                         | C16:1/23:0    |
|        |                      | 264.22 | 18:1 – H <sub>2</sub> O | 326.59 | 21:0                    | C18:1/21:0    |
|        |                      | 268.24 | 17:1                    | 340.68 | 22:0                    | C17:1/22:0    |
| 934.71 | d39:0 or<br>d38:1–OH | 236.24 | 16:1 – H <sub>2</sub> O |        |                         | C16:1/22:0–OH |
|        |                      | 256.26 | 16:0                    | 354.37 | 23:0                    | C16:0/23:0    |
|        |                      | 274.27 | 16:0 + H <sub>2</sub> O | 354.37 | 22:1 – H + OH           | C16:0/22:1–OH |
| 942.72 | d40:3                | 236.24 | 16:1 – H <sub>2</sub> O |        |                         | C16:1/24:2    |
|        |                      | 250.25 | 17:1 – H <sub>2</sub> O | 368.39 | 23:2 + H <sub>2</sub> O | C17:1/23:2    |
|        |                      | 264.27 | 18:1 – H <sub>2</sub> O | 354.37 | 22:2 + H <sub>2</sub> O | C18:1/22:2    |
| 946.72 | d40:1                | 236.30 | 16:1 – H <sub>2</sub> O | 368.76 | 24:0                    | C16:1/24:0    |
|        |                      | 250.32 | 17:1 – H <sub>2</sub> O |        |                         | C17:1/23:0    |
|        |                      | 264.37 | 18:1 – H <sub>2</sub> O | 340.36 | 22:0                    | C18:1/22:0    |
|        |                      | 278.56 | 19:1 – H <sub>2</sub> O |        |                         | C19:1/21:0    |
| 948.73 | d40:0 or<br>d39:1–OH | 236.24 | 16:1 – H <sub>2</sub> O |        |                         | C16:1/23:0–OH |
|        |                      | 250.25 | 17:1 – H <sub>2</sub> O |        |                         | C17:1/22:0–OH |
|        |                      | 256.26 | 16:0                    | 368.39 | 24:0                    | C16:0/24:0    |
|        |                      | 264.27 | 18:1 – H <sub>2</sub> O |        |                         | C18:1/21:0–OH |

|         |       |        |                         |        |                         |            |
|---------|-------|--------|-------------------------|--------|-------------------------|------------|
|         |       | 284.29 | 18:0                    | 340.36 | 22:0                    | C18:0/22:0 |
| 954.76  | d41:4 | 254.27 | 16:1                    |        |                         | C16:1/25:3 |
|         |       | 250.07 | 17:1 - H <sub>2</sub> O |        |                         | C17:1/24:0 |
|         |       | 252.36 | 17:0 - H <sub>2</sub> O |        |                         | C17:0/24:1 |
| 960.73  | d41:1 | 264.37 | 18:1 - H <sub>2</sub> O | 354.46 | 23:0                    | C18:1/23:0 |
|         |       | 278.23 | 19:1 - H <sub>2</sub> O |        |                         | C19:1/22:0 |
|         |       | 292.36 | 20:1 - H <sub>2</sub> O |        |                         | C20:1/21:0 |
|         |       | 250.31 | 17:1 - H <sub>2</sub> O |        |                         | C17:1/25:0 |
|         |       | 252.50 | 17:0 - H <sub>2</sub> O |        |                         | C17:0/25:1 |
| 974.75  | d42:1 | 264.17 | 18:1 - H <sub>2</sub> O | 350.42 | 24:0 - H <sub>2</sub> O | C18:1/24:0 |
|         |       | 278.25 | 19:1 - H <sub>2</sub> O |        |                         | C19:1/23:0 |
|         |       | 252.27 | 17:0 - H <sub>2</sub> O | 392.39 | 26:2                    | C17:0/26:2 |
| 986.66  | d43:2 | 264.27 | 18:1 - H <sub>2</sub> O | 380.39 | 25:1                    | C18:1/25:1 |
|         |       | 278.28 | 19:1 - H <sub>2</sub> O |        |                         | C19:1/24:1 |
|         |       | 292.30 | 20:1 - H <sub>2</sub> O |        |                         | C20:1/23:1 |
|         |       | 252.27 | 17:0 - H <sub>2</sub> O |        |                         | C17:0/26:1 |
|         |       | 264.27 | 18:1 - H <sub>2</sub> O | 382.40 | 25:0                    | C18:1/25:0 |
| 988.59  | d43:1 | 278.28 | 19:1 - H <sub>2</sub> O | 386.12 | 24:0 + H <sub>2</sub> O | C19:1/24:0 |
|         |       | 292.30 | 20:1 - H <sub>2</sub> O | 354.37 | 23:0                    | C20:1/23:0 |
|         |       | 262.25 | 18:2 - H <sub>2</sub> O |        |                         | C18:2/26:4 |
|         |       | 264.27 | 18:1 - H <sub>2</sub> O | 386.12 | 26:5                    | C18:1/26:5 |
| 992.76  | d44:6 | 300.29 | 21:4 - H <sub>2</sub> O | 368.39 | 23:2 + H <sub>2</sub> O | C21:4/23:2 |
|         |       | 318.3  | 22:2 - H <sub>2</sub> O | 332.32 | 22:4                    | C22:2/22:4 |
|         |       | 252.27 | 17:0 - H <sub>2</sub> O |        |                         | C17:0/27:1 |
|         |       | 264.27 | 18:1 - H <sub>2</sub> O | 396.42 | 26:0                    | C18:1/26:0 |
| 1002.77 | d44:1 | 278.28 | 19:1 - H <sub>2</sub> O |        |                         | C19:1/25:0 |
|         |       | 292.30 | 20:1 - H <sub>2</sub> O | 368.39 | 24:0                    | C20:1/24:0 |

**Table S9.** Responses of GalCer 18:1/18:0 and GluCer 18:1/18:0 at the same molar concentrations and their comparisons.

|              | GalCer 18:1/18:0 Area | GluCer 18:1/18:0 Area | Ratio |
|--------------|-----------------------|-----------------------|-------|
| 12.5 $\mu$ M | 8.29E + 07            | 7.98E + 07            | 104%  |
| 25 $\mu$ M   | 2.03E + 08            | 1.90E + 08            | 107%  |
| 50 $\mu$ M   | 2.89E + 08            | 3.17E + 08            | 91%   |
| 100 $\mu$ M  | 4.56E + 08            | 4.62E + 08            | 99%   |
| 200 $\mu$ M  | 6.32E + 08            | 6.49E + 08            | 97%   |
